# Supplementary material for: Targeted tumor CT imaging using folic acid-modified PEGylated dendrimer-entrapped gold nanoparticles
Source: Royal Society of Chemistry journal article supplement (doi:10.1039/c3py00521f), 2013-01-01
Supplement: c3py00521f.pdf [file c3py00521f.pdf]

## Electronic Supplementary Information

### Targeted tumor CT imaging using folic acid-modified PEGylated dendrimer-entrapped gold nanoparticles

Chen Peng,<sup>a1</sup> Jinbao Qin,<sup>b1</sup> Benqing Zhou,<sup>c</sup> Qian Chen,<sup>a</sup> Mingwu Shen,<sup>c</sup> Meifang Zhu,<sup>a</sup> Xinwu Lu,<sup>b\*</sup> Xiangyang Shi<sup>a,c,d,\*</sup>

<sup>a</sup> State Key Laboratory for Modification of Chemical Fibers and Polymer Materials, College of Materials Science and Engineering, Donghua University, Shanghai 201620, People's Republic of China

<sup>b</sup> Department of Vascular Surgery, Shanghai Ninth People's Hospital, School of Medicine, Shanghai Jiaotong University, Shanghai 200080, People's Republic of China

<sup>c</sup> College of Chemistry, Chemical Engineering and Biotechnology, Donghua University, Shanghai 201620, People's Republic of China

<sup>d</sup> CQM-Centro de Química da Madeira, Universidade da Madeira, Campus da Penteada, 9000-390 Funchal, Portugal

---

\* To whom correspondence should be addressed. E-mail: luxinwu@yahoo.com.cn (X. Lu), and xshi@dhu.edu.cn (X. Shi).

<sup>1</sup> Authors contributed equally to this work.

**Table S1.** The tumor volume and weight in different groups.

| Animal group | Tumor volume <sup>a</sup> (mm <sup>3</sup> ) | Tumor weight (g) |
|--------------|----------------------------------------------|------------------|
| (1)          | 115                                          | 0.16             |
| (2)          | 201                                          | 0.26             |
| (3)          | 199                                          | 0.24             |
| (4)          | 220                                          | 0.30             |
| (5)          | 228                                          | 0.32             |
| (6)          | 232                                          | 0.31             |

- (1) Intravenous injection of [(Au<sup>0</sup>)<sub>300</sub>-G5.NHAc-(PEG-FA)-*m*PEG] DENPs into KB-tumor mice;
- (2) Intraperitoneal injection of [(Au<sup>0</sup>)<sub>300</sub>-G5.NHAc-(PEG-FA)-*m*PEG] DENPs into KB-tumor mice;;
- (3) Intravenous injection of [(Au<sup>0</sup>)<sub>300</sub>-G5.NHAc-(PEG-FA)-*m*PEG] DENPs into free FA-blocked KB-tumor mice;
- (4) Intraperitoneal injection of [(Au<sup>0</sup>)<sub>300</sub>-G5.NHAc-(PEG-FA)-*m*PEG] DENPs into free FA-blocked KB-tumor mice;
- (5) Intravenous injection of [(Au<sup>0</sup>)<sub>300</sub>-G5.NHAc-*m*PEG] DENPs into KB-tumor mice;
- (6) Intraperitoneal injection of [(Au<sup>0</sup>)<sub>300</sub>-G5.NHAc-*m*PEG] DENPs into KB-tumor mice.

<sup>a</sup> The tumor volume was calculated according to the equation  $V=\pi(a\times b\times c)/6$ , where  $V$  is the tumor volume,  $a$ ,  $b$ , and  $c$  are the length, width, and height of the tumor, respectively.

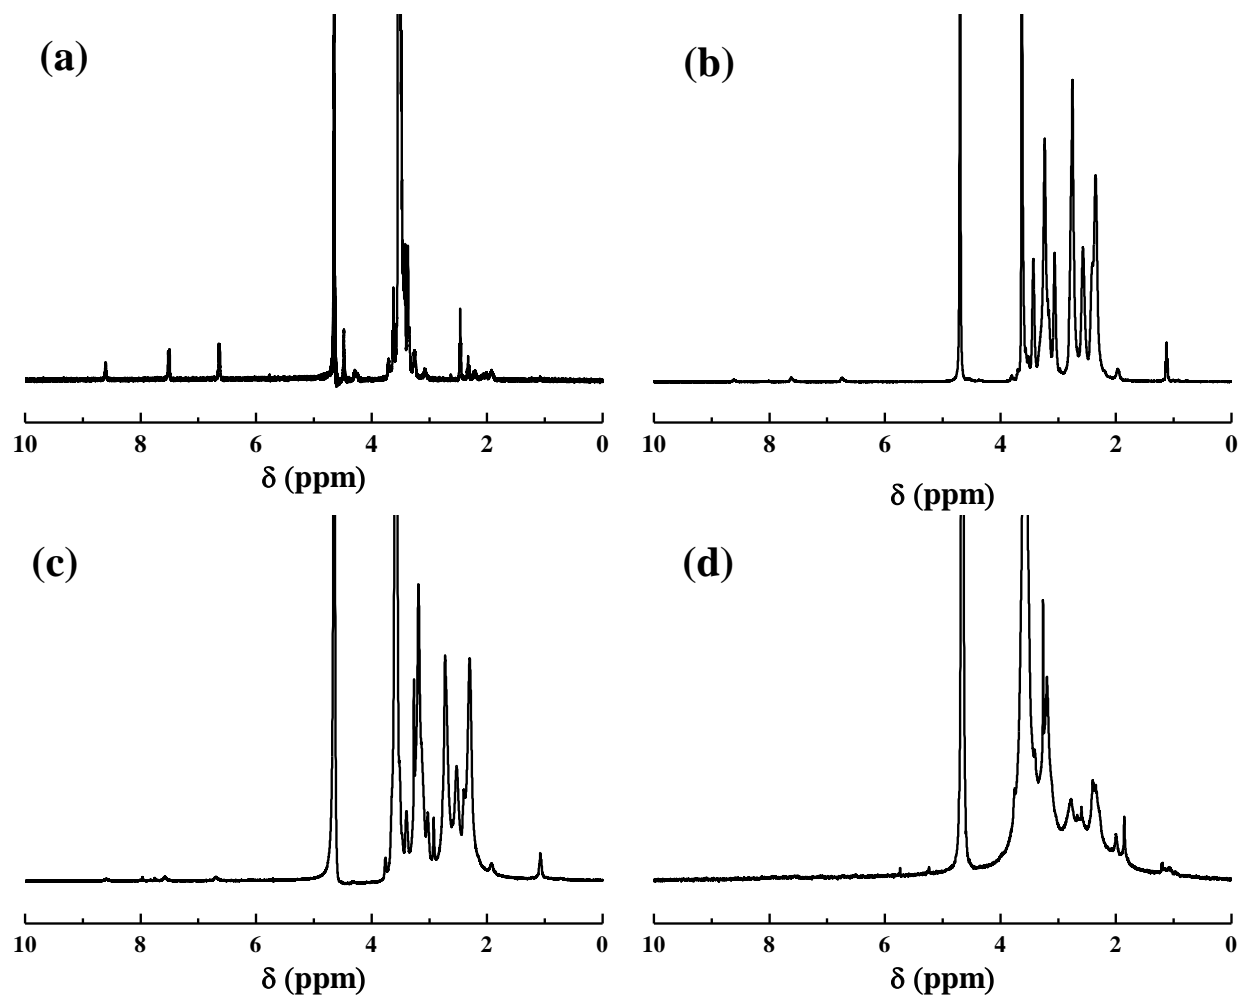

**Figure S1.**  $^1\text{H}$  NMR spectra of HOOC-PEG-FA (a), G5.NH<sub>2</sub>-(PEG-FA) (b), G5.NH<sub>2</sub>-(PEG-FA)-mPEG (c), and [(Au<sup>0</sup>)<sub>300</sub>-G5.NHAc-(PEG-FA)-mPEG] DENPs (d).

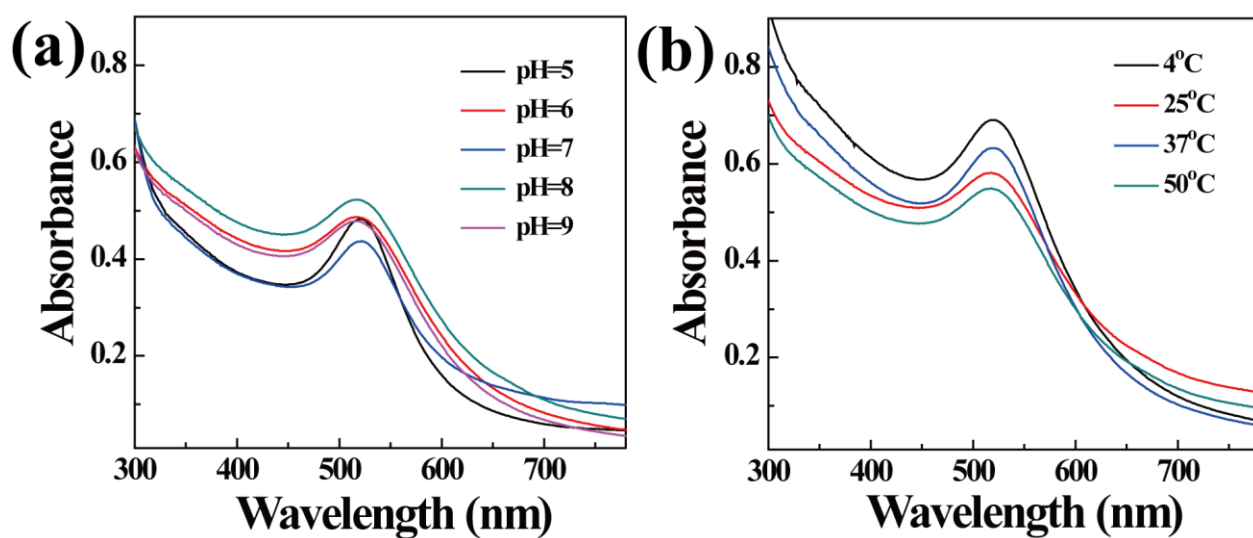

**Figure S2.** UV-vis spectra of [(Au<sup>0</sup>)<sub>300</sub>-G5.NHAc-(PEG-FA)-mPEG] DENPs dispersed in phosphate buffer (pH = 5-9) at room temperature (25 °C) (a) and in water solution (pH = 7) at different temperatures (4-50 °C) (b).

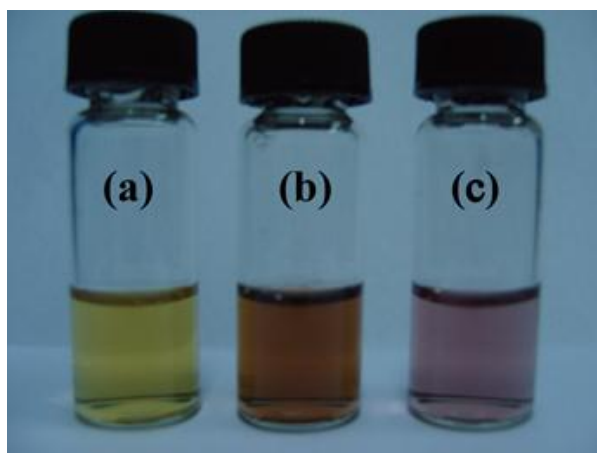

**Figure S3.** Photos of (a) cell culture medium, (b) [(Au<sup>0</sup>)<sub>300</sub>-G5.NHAc-(PEG-FA)-mPEG] DENPs dispersed in cell culture medium, and (c) [(Au<sup>0</sup>)<sub>300</sub>-G5.NHAc-(PEG-FA)-mPEG] DENPs dispersed in PBS buffer.

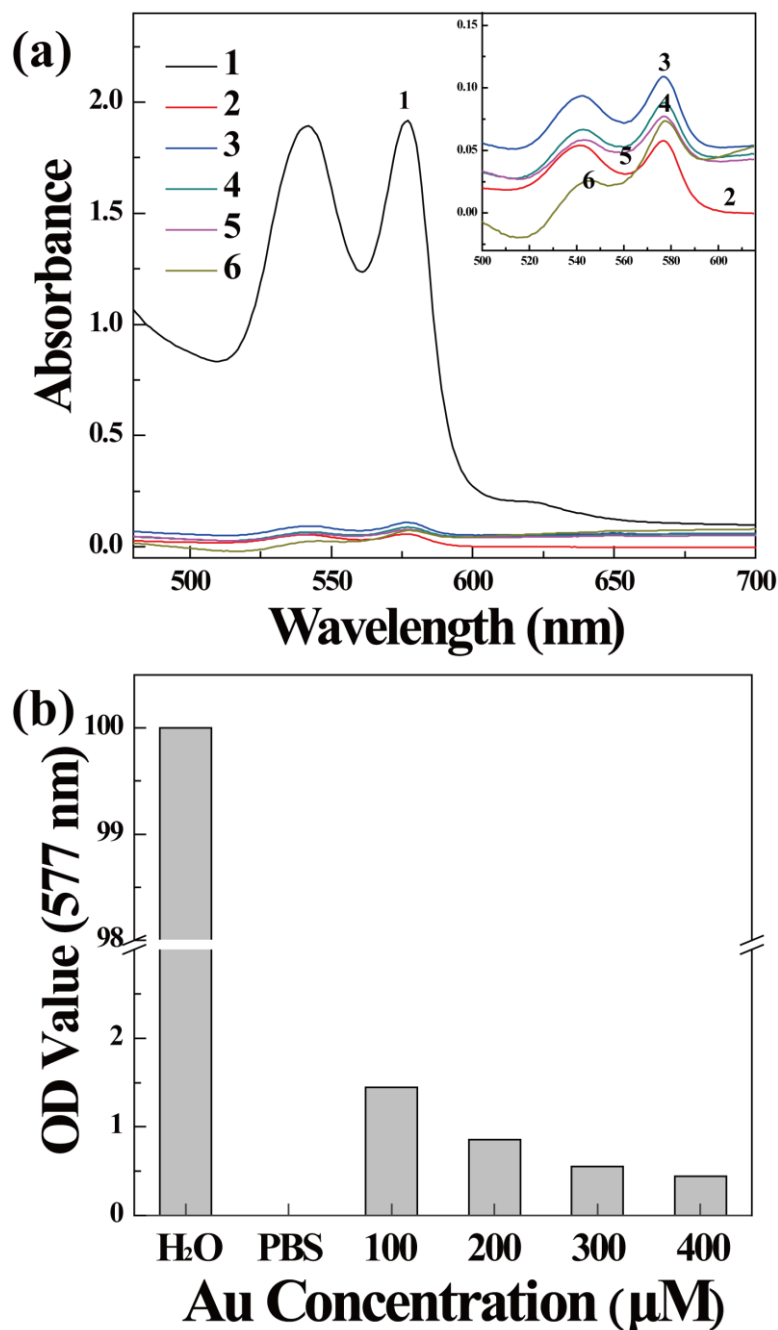

**Figure S4.** (a) UV-vis spectra of the HRBC suspensions treated with [(Au<sup>0</sup>)<sub>300</sub>-G5.NHAc-(PEG-FA)-*m*PEG] DENPs at different Au concentrations (100 μM (3), 200 μM (4), 300 μM (5), and 400 μM (6), respectively) and (b) hemolysis percentage of the Au DENPs as a function of the Au concentration. In both (a) and (b), H<sub>2</sub>O (1) and PBS (2) were used as positive and negative control, respectively. Inset of (a) shows the enlarged UV-vis spectra of Samples 2-6.

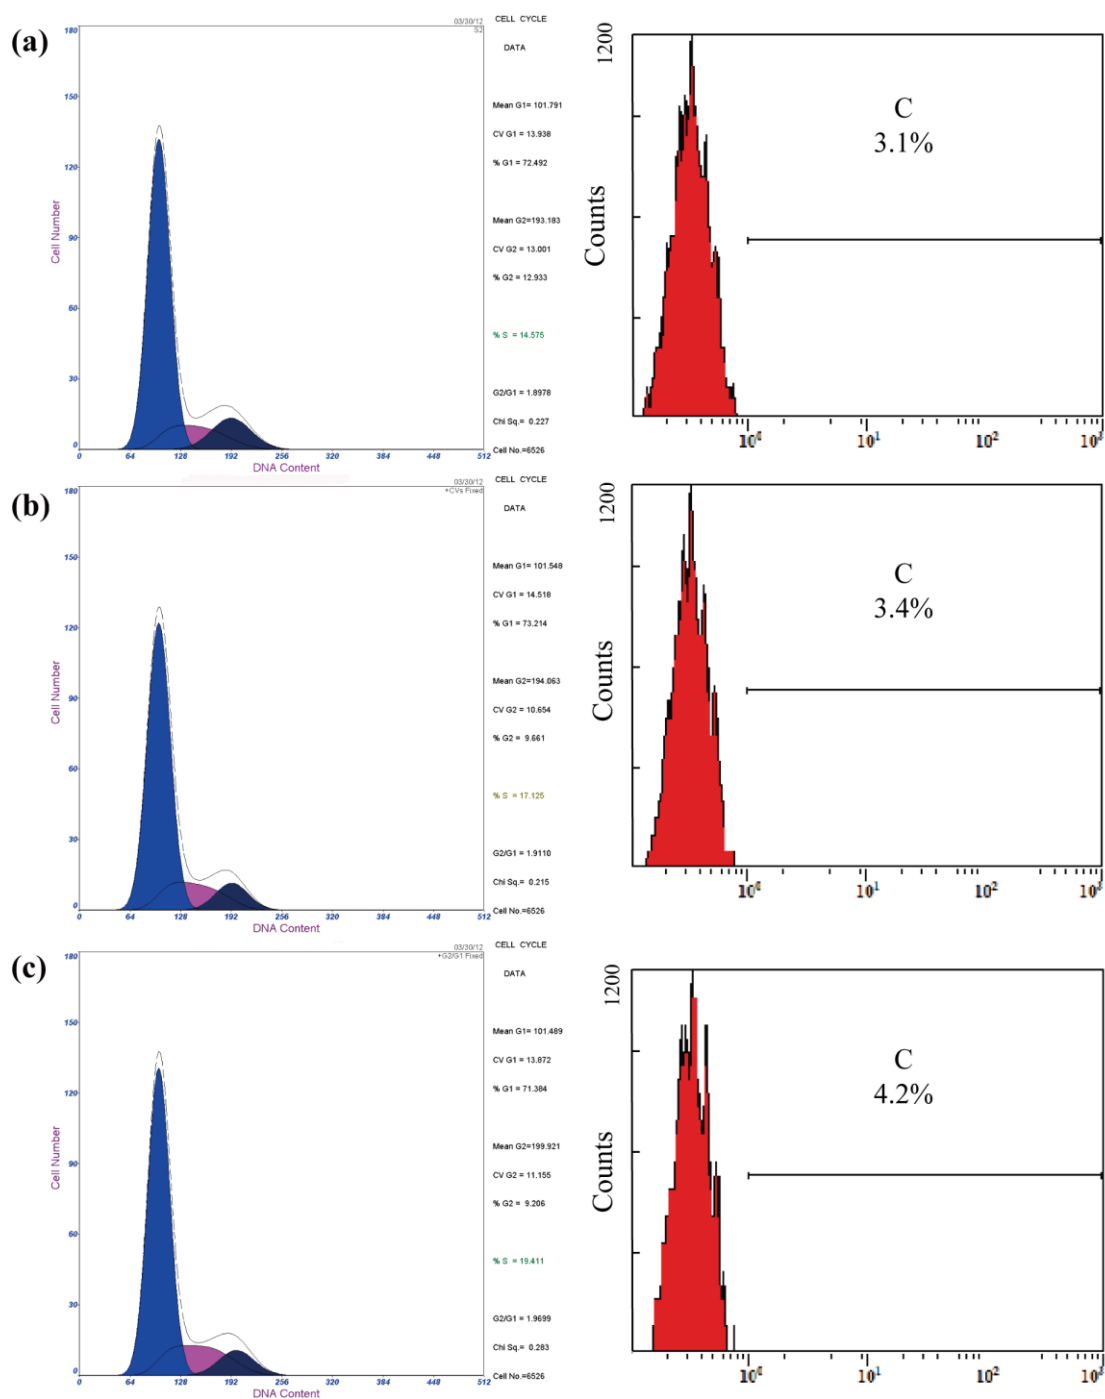

**Figure S5.** Flow cytometry analysis of KB cells treated without (a) or with  $[(\text{Au}^0)_{300}\text{-G5.NHAc-(PEG-FA)-}m\text{PEG}]$  DENPs at the Au concentration of 100  $\mu\text{M}$  (b) and 300  $\mu\text{M}$  (c), respectively for 24 h (n=4).

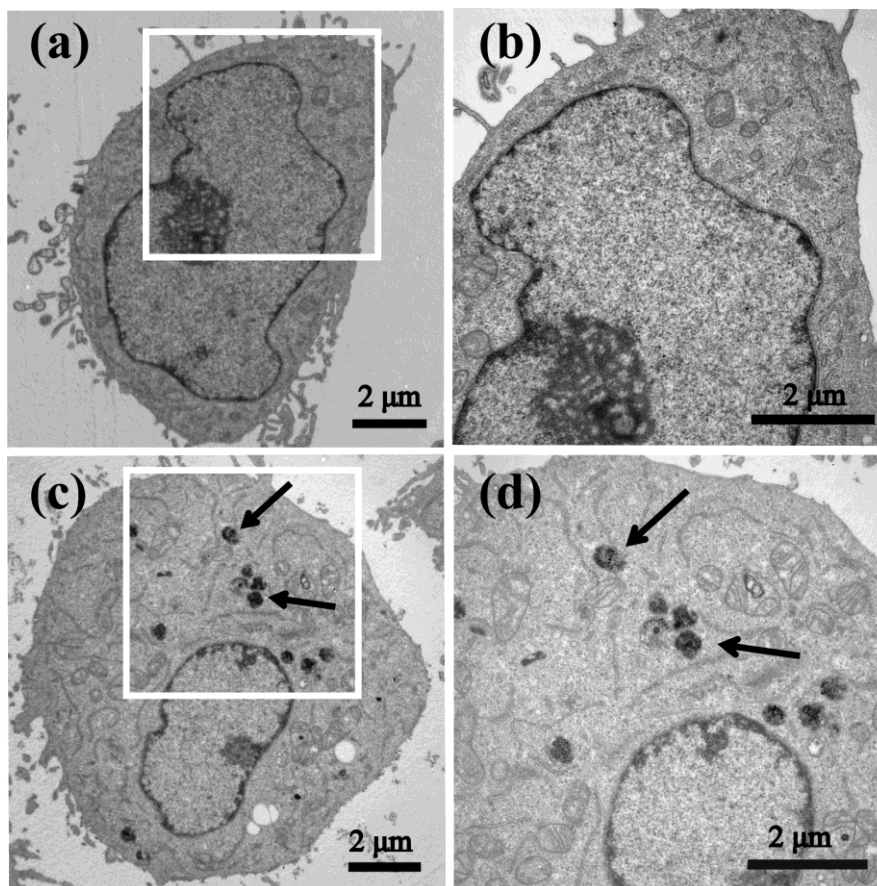

**Figure S6.** TEM images of negative control KB-HFAR cells without treatment (a, b) and KB-HFAR cells incubated with  $[(\text{Au}^0)_{300}\text{-G5.NHAc-(PEG-FA)-}m\text{PEG}]$  DENPs ( $[\text{Au}] = 200 \mu\text{M}$ ) (c, d). The black arrow in (c) and (d) shows the domain of the Au DENPs.

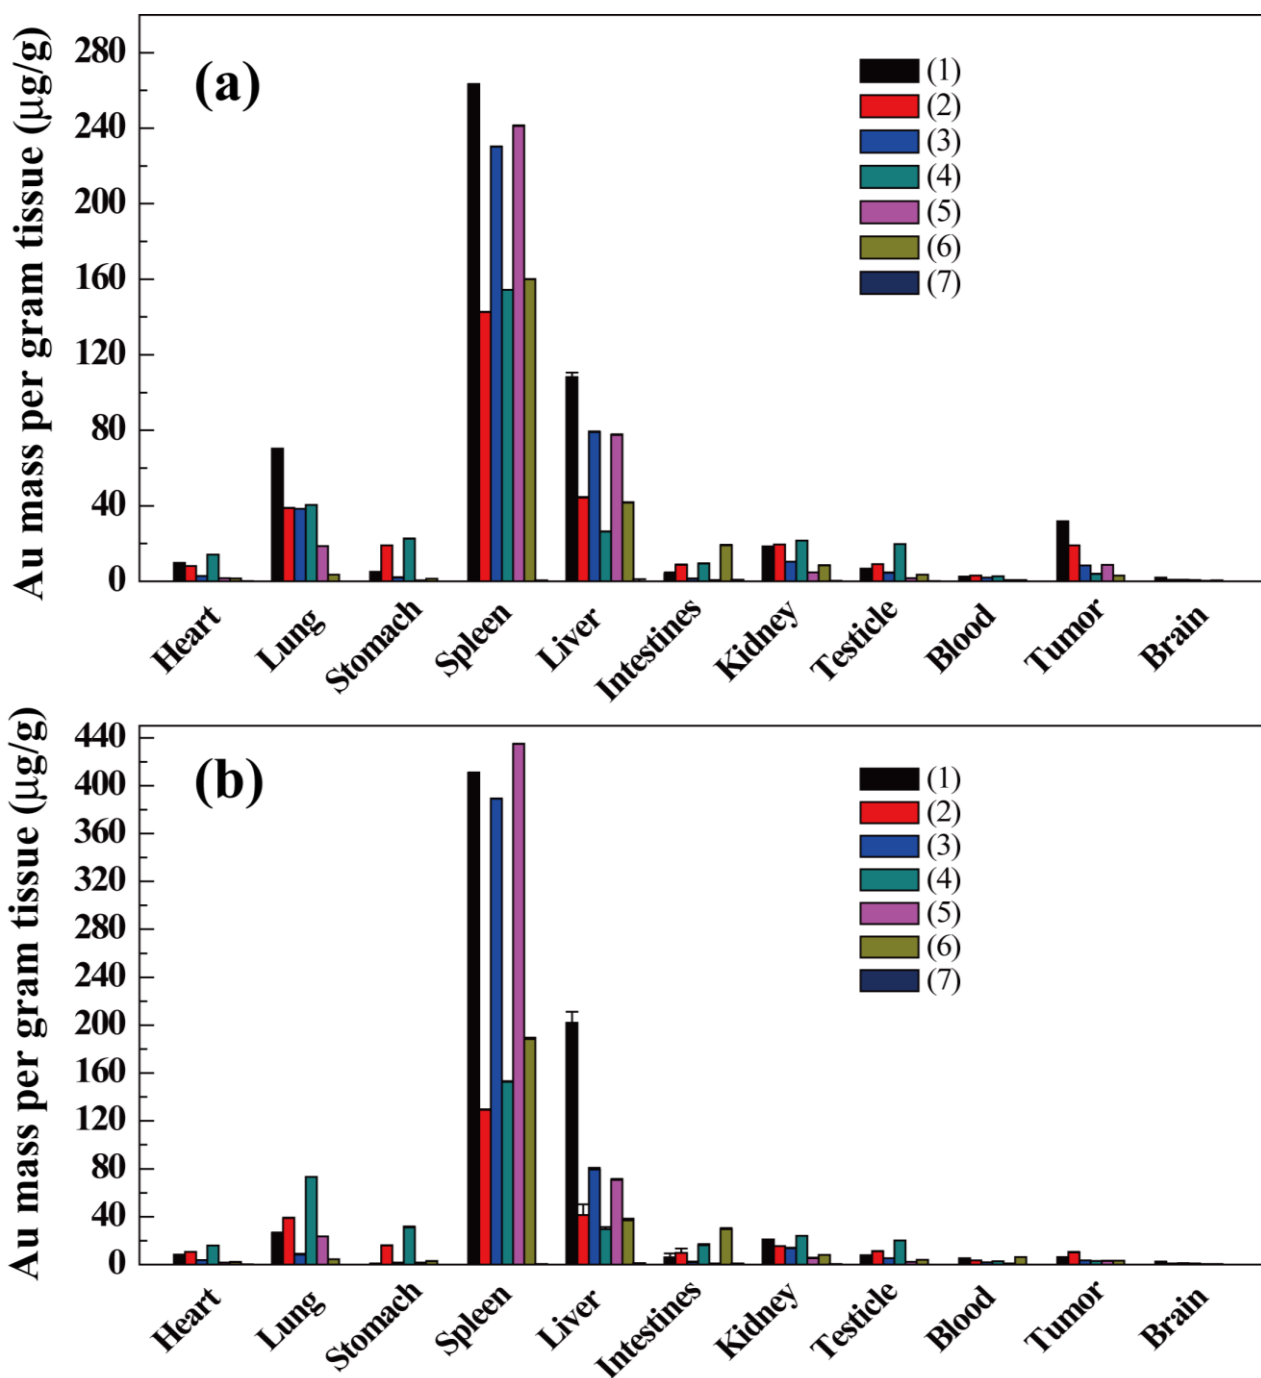

**Figure S7.** The biodistribution of the KB tumor-bearing nude mice before and after injected with  $[(Au^0)_{300}-G5.NHAc-(PEG-FA)-mPEG]$  DENPs and  $[(Au^0)_{300}-G5.NHAc-mPEG]$  DENPs by different injection routes for 6 h (a) and 24 h (b). (1) Intravenous injection of  $[(Au^0)_{300}-G5.NHAc-(PEG-FA)-mPEG]$  DENPs into KB-tumor mice, (2) Intraperitoneal injection of  $[(Au^0)_{300}-G5.NHAc-(PEG-FA)-mPEG]$  DENPs into KB-tumor mice, (3) Intravenous injection of  $[(Au^0)_{300}-G5.NHAc-(PEG-FA)-mPEG]$  DENPs into free FA-blocked KB-tumor mice, (4) Intraperitoneal injection of  $[(Au^0)_{300}-G5.NHAc-(PEG-FA)-mPEG]$  DENPs into free FA-blocked KB-tumor mice, (5) Intravenous injection of  $[(Au^0)_{300}-G5.NHAc-mPEG]$  DENPs into KB-tumor mice, (6) Intraperitoneal injection of  $[(Au^0)_{300}-G5.NHAc-mPEG]$  DENPs into KB-tumor mice, and (7) the control mice without injection.



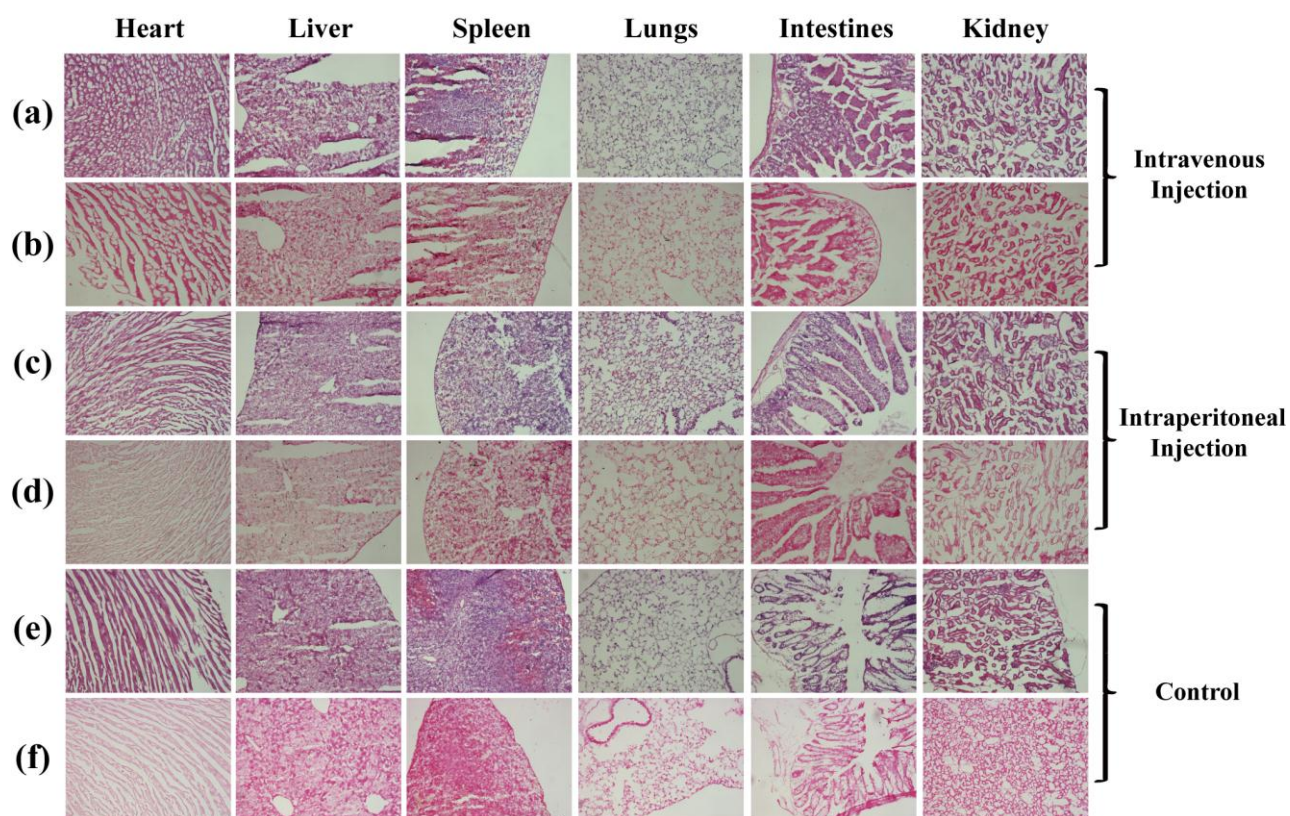

**Figure S8.** HE staining (a, c, and e) and silver staining (b, d, and f) of main organs in nude mice before (e and f) and after injected with  $[(Au^0)_{300}\text{-G5.NHAc-(PEG-FA)-mPEG}]$  DENPs (a, b, c, and d) by different injection routes for one month.
